# Supplementary material
Source: PubMed Central journal article supplement (PMC9290393)
Supplement: NIHMS1795388-supplement-2.pdf [file NIHMS1795388-supplement-2.pdf]

## **Supplemental Information**

### **Specification of fetal liver endothelial progenitors to functional zoned adult sinusoids requires c-Maf induction**

**Jesus Maria Gomez-Salintero<sup>1,\*,#</sup>, Franco Izzo<sup>2,\*</sup>, Yang Lin<sup>1</sup>, Sean Houghton<sup>1</sup>, Tomer Itkin<sup>1</sup>, Fuqiang Geng<sup>1</sup>, Yaron Bram<sup>3</sup>, Robert P. Adelson<sup>4</sup>, Tyler M. Lu<sup>1,5</sup>, Giorgio Ga. Inghirami<sup>6</sup>, Jenny Zhaoying Xiang<sup>7</sup>, Raphael Lis<sup>1,5</sup>, David Redmond<sup>1</sup>, Ryan Schreiner<sup>1</sup>, Sina Y. Rabbany<sup>1,4</sup>, Dan A. Landau<sup>2</sup>, Robert E. Schwartz<sup>3</sup>, and Shahin Rafii<sup>1,#</sup>**

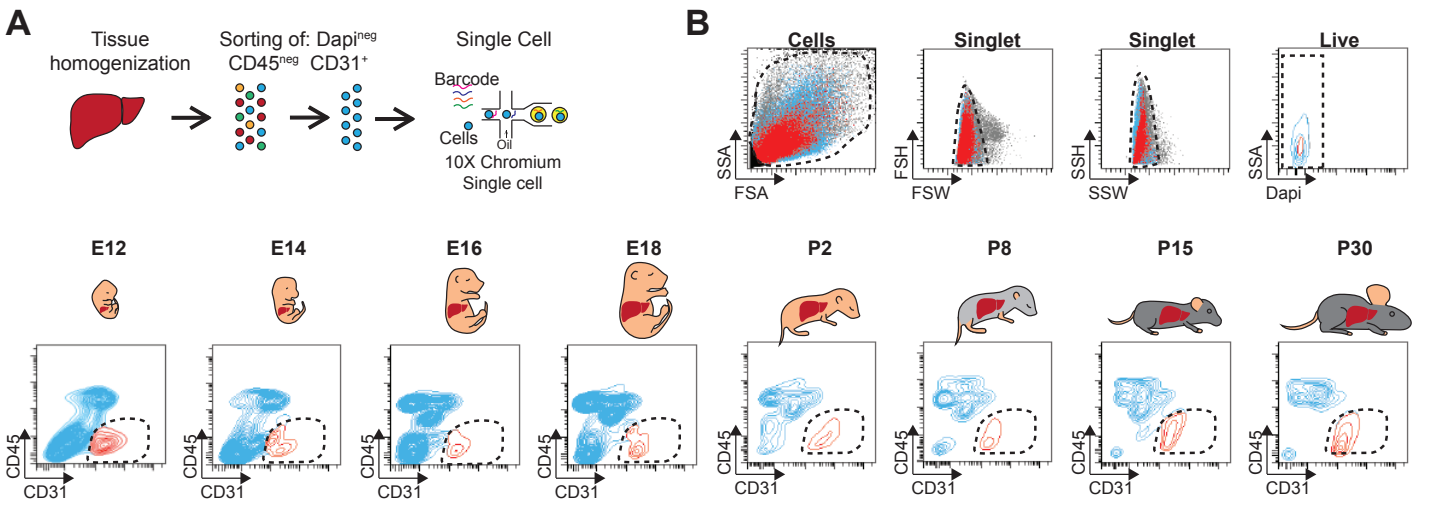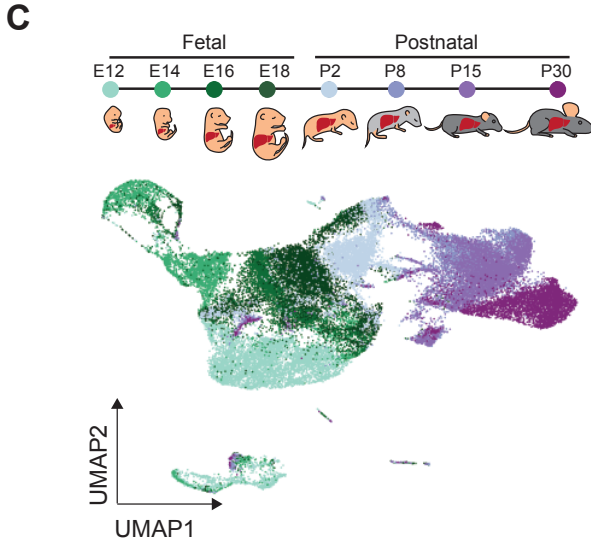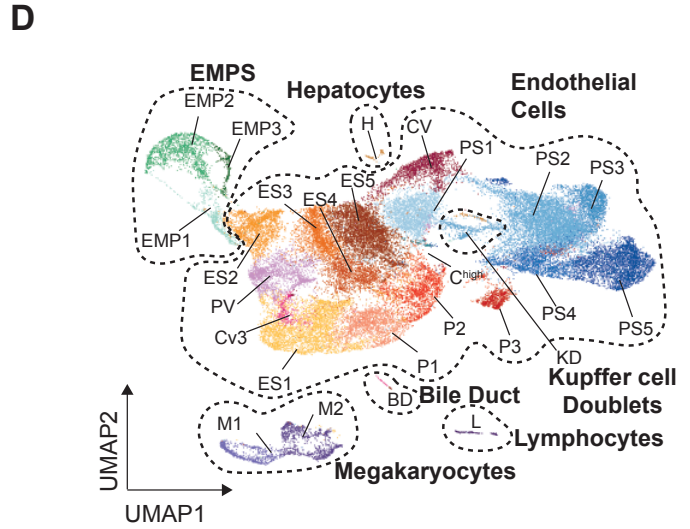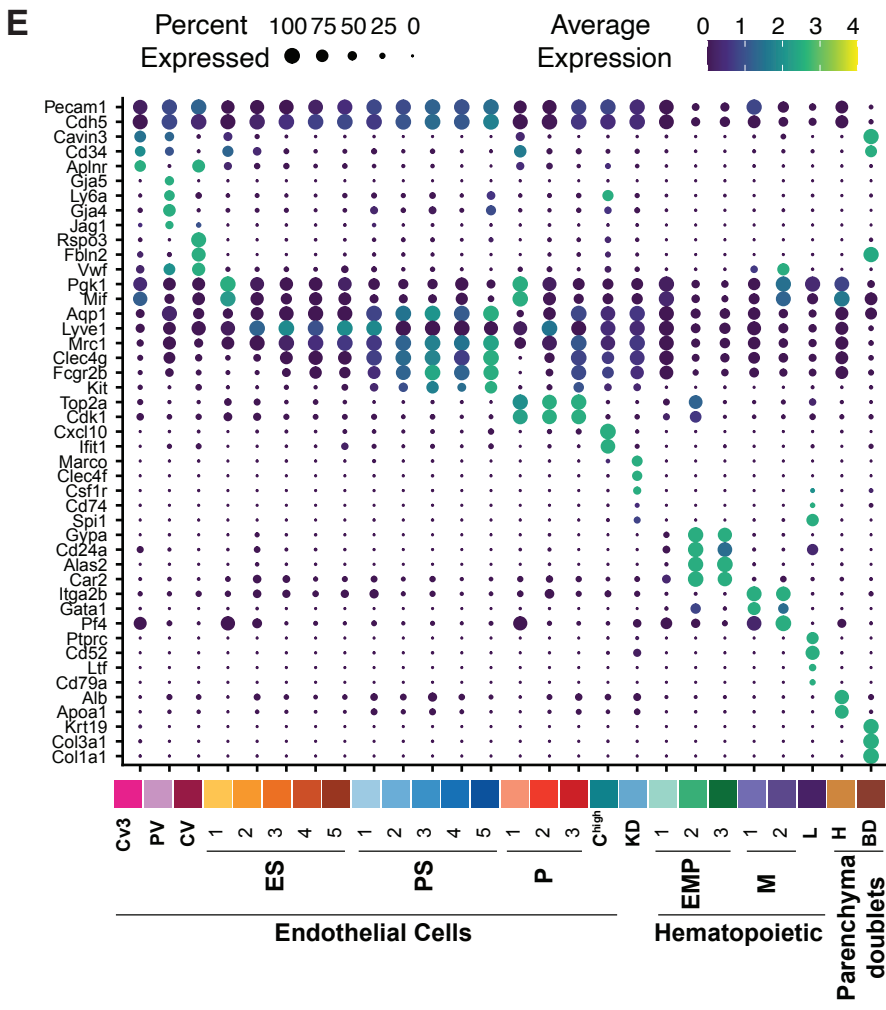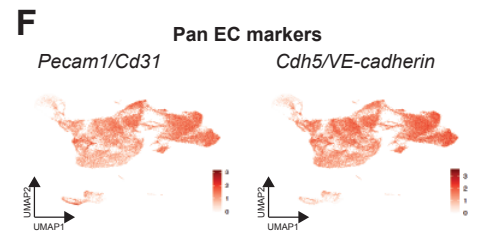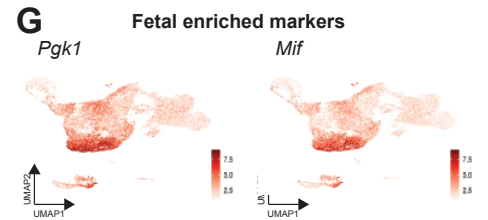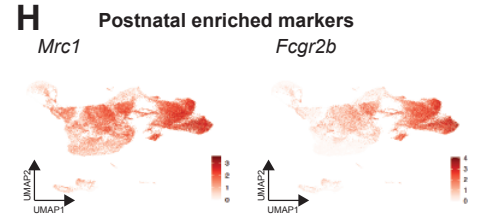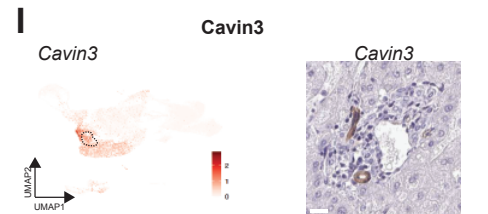

**Figure S1. Identification of cell populations across multiple times during liver development using single cell RNA-seq. Related to Figure 1.**

(A) Liver samples were mechanically homogenized in a solution of Collagenase/Dispase, and labeled with CD31 and CD45 antibodies and Dapi to identified live cells. Endothelial cells (ECs) identified as Dapi<sup>neg</sup>CD45<sup>neg</sup>CD31<sup>+</sup> were sorted and single cell RNA-seq analysis was performed using this population. (B) Representation of the gating strategy used to enrich the vascular population prior to performing single cell RNA-seq analysis. The ECs are identified as the red population within the dashed line that is CD45<sup>neg</sup>CD31<sup>+</sup> at different fetal and postnatal developmental timepoints. (C,D) UMAP from single cell analysis of sorted liver endothelial cells (ECs; CD45<sup>neg</sup>CD31<sup>+</sup>) at fetal and postnatal timepoints: E12, E14, E16, E18, P2, P8, P15 and P30. Colors are assigned based on the sample timepoint (C) or cell cluster (D). Labeling corresponds to the different populations identified from the single cell analysis from (D): Cavin3<sup>+</sup>: Cv3, Portal Vein: PV, Central Vein: CV, Fetal sinusoidal EC populations: FS1-5, Postnatal sinusoidal EC populations: PS1-5, Proliferating ECs: P1-3, Cxcl10 high expressing ECs (C<sup>high</sup>): C, Erythro-myeloid progenitors: EMP1-3, Megakaryocytes: M1-2, Lymphocytes: L, Hepatocytes: H, Bile Duct: BD, Kupffer cell Doublets: KD. (E), Identification of specific markers associated to the individual populations identified in the single cell analysis. Colors were assigned as on (D), with the graphical representation of the vasculature including colors used to label each subpopulation. (F) The pan endothelial cell markers Pecam1/Cd31 and Cdh5/VE-cadherin were used to identify vascular populations as double positive cells for these two markers. (G) Identification of vascular fetal enriched markers Pdgfra and Mif, which have elevated expression during early fetal development. (H) During postnatal vascular development the endothelium increases the expression of genes such as Mrc1 and Fcgr2b. (I) Cavin3<sup>+</sup> population can be identified by the expression of Cavin3. Expression of Cavin3 is restricted in the human adult vasculature to the Hepatic Artery based on the data from the Human Protein Atlas (bar size = 25  $\mu$ m), which were not present together in other large vessels.

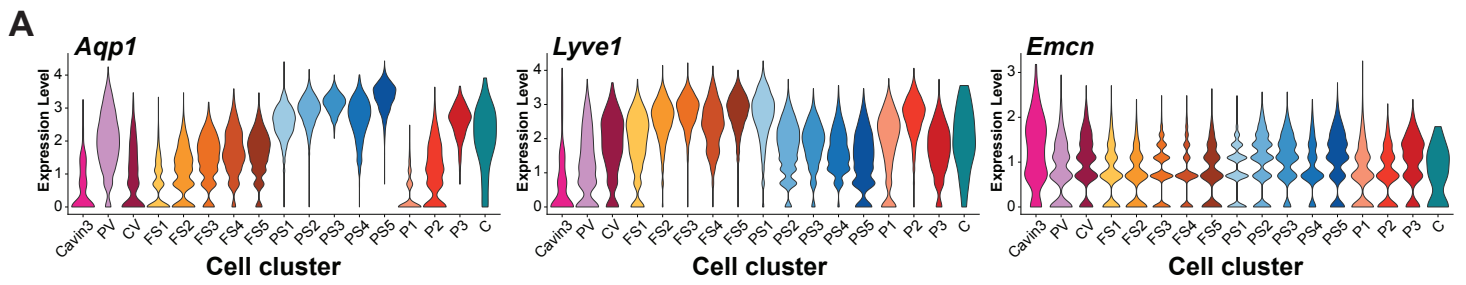

**B** *Aqp1* *Lyve1* *Emcn*

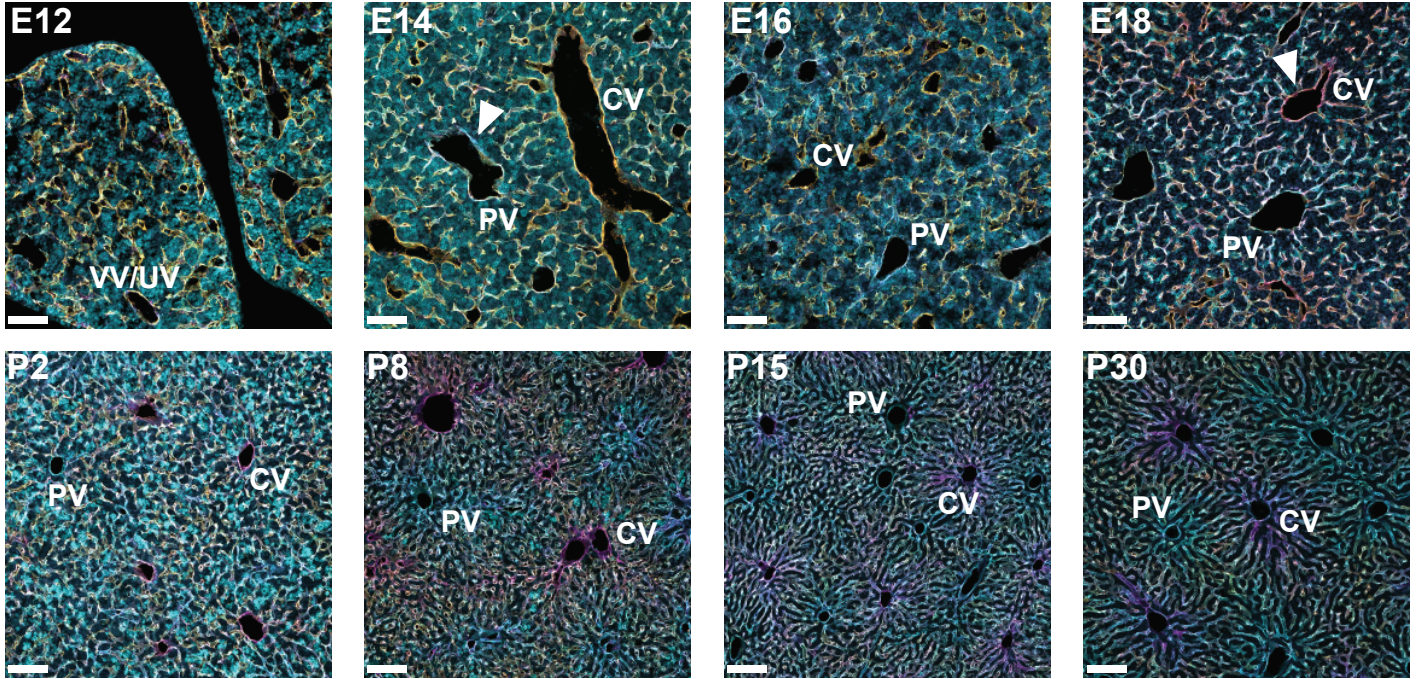

**C**

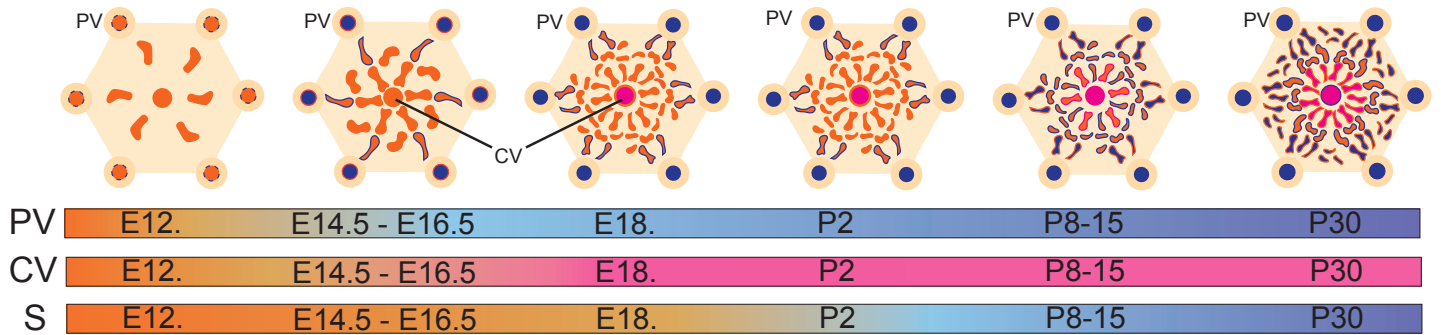

**D**

*E-cadherin* *Cyp2E1* *Dapi*

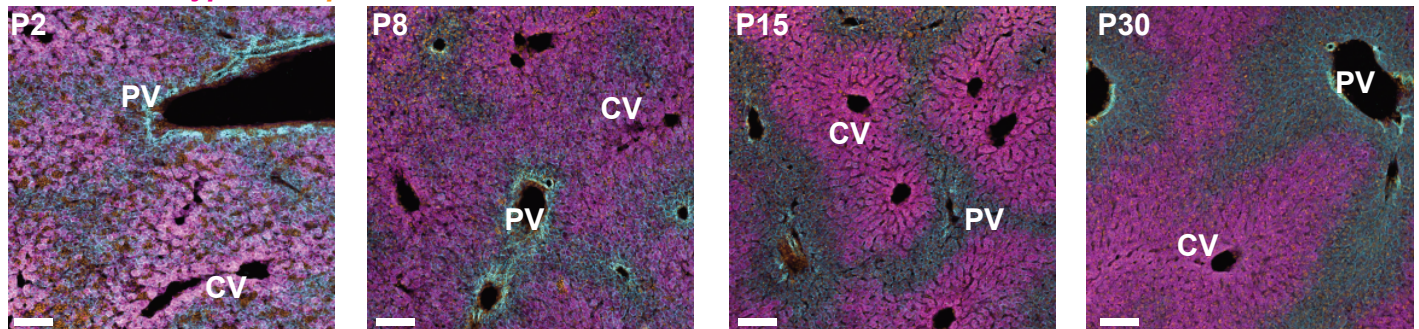

**Figure S2. Immunofluorescence characterization of large vessel development. Related to Figure 1.**

(A), Violin plots of the expression values of Aqp1, Lyve1 and Emcn in the different EC subpopulations. (B), Immunofluorescence analysis of the vascular markers Aqp1, Lyve1 and Emcn across fetal and postnatal developmental timepoints. Aqp1 emergence can be observed within the Portal Vein (PV) at E14 (arrow). Staining of the venous marker endomucin (Emcn) can be observed in the Central Vein (CV) from E18 onwards (arrow at E18). Representative images from n = 5, Bar size = 100 $\mu$ m. (C) Graphical presentation identifying the acquisition of the different markers in the Portal Vein (PV), Central Vein (CV) and Sinusoids (S). (D) Immunofluorescent analysis of the hepatocyte zonated Portal Vein marker E-cadherin and the centrilobular marker Cyp2E1, with nucleus stained with Dapi. Representative image of n = 5. Bar size = 100  $\mu$ m.

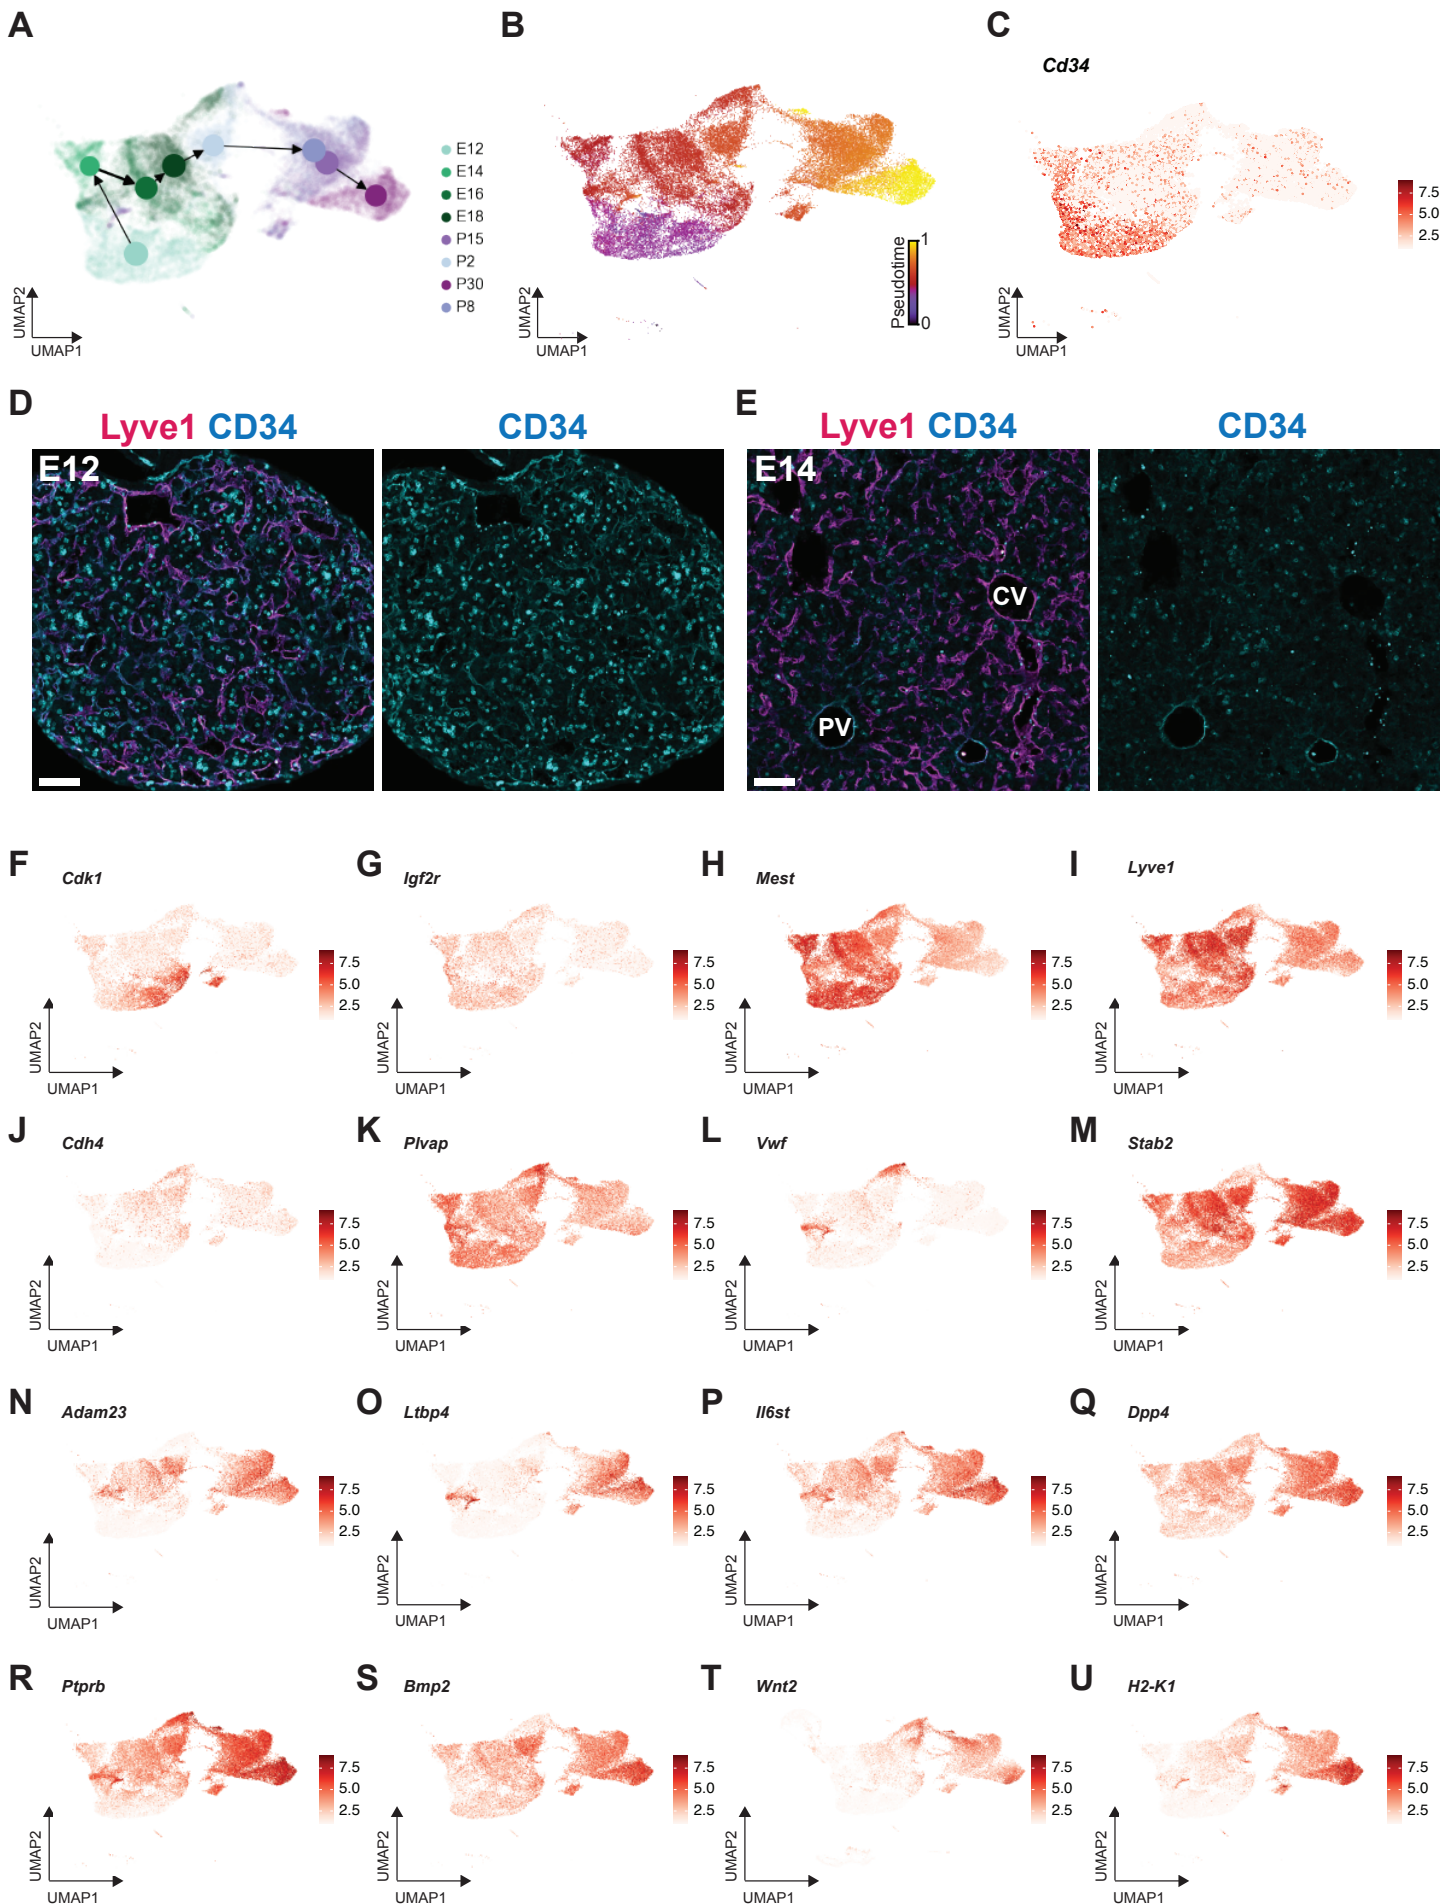

**Figure S3. Single cell pseudotime analysis defines a temporal expression of angiocrine factors in development. Related to Figure 2.**

(A) Partition-based graph abstraction analysis of transition confidence between developmental stages. (B) Pseudotime prediction of gene expression transition from the EC populations. (C) UMAP representation of CD34 expression in the EC clusters. Higher expression levels were observed at E12. (D-E) Immunofluorescence analysis of Lyve1 and CD34 at E12 (D) and E14 (E) of fetal development. CD34 stained was present in all ECs at E12 whereas restricted to the Portal Vein at E14. (F-U) Expression of genes identified by pseudotime analysis that has significant expression changes from E12 of fetal developmental timepoints to postnatal day P30. Expression of *Cdk1*, *Igf2r*, *Mest*, *Lyve1*, *Cdh4*, and *Plvap* (F-K) were more enriched during fetal development, whereas *Vwf*, *Stab2*, *Adam23*, *Ltbp4*, *Il6st*, *Dpp4*, *Ptprb*, *Bmp2*, *Wnt2*, *H2-K1* (L-U) were more enriched postnatally.

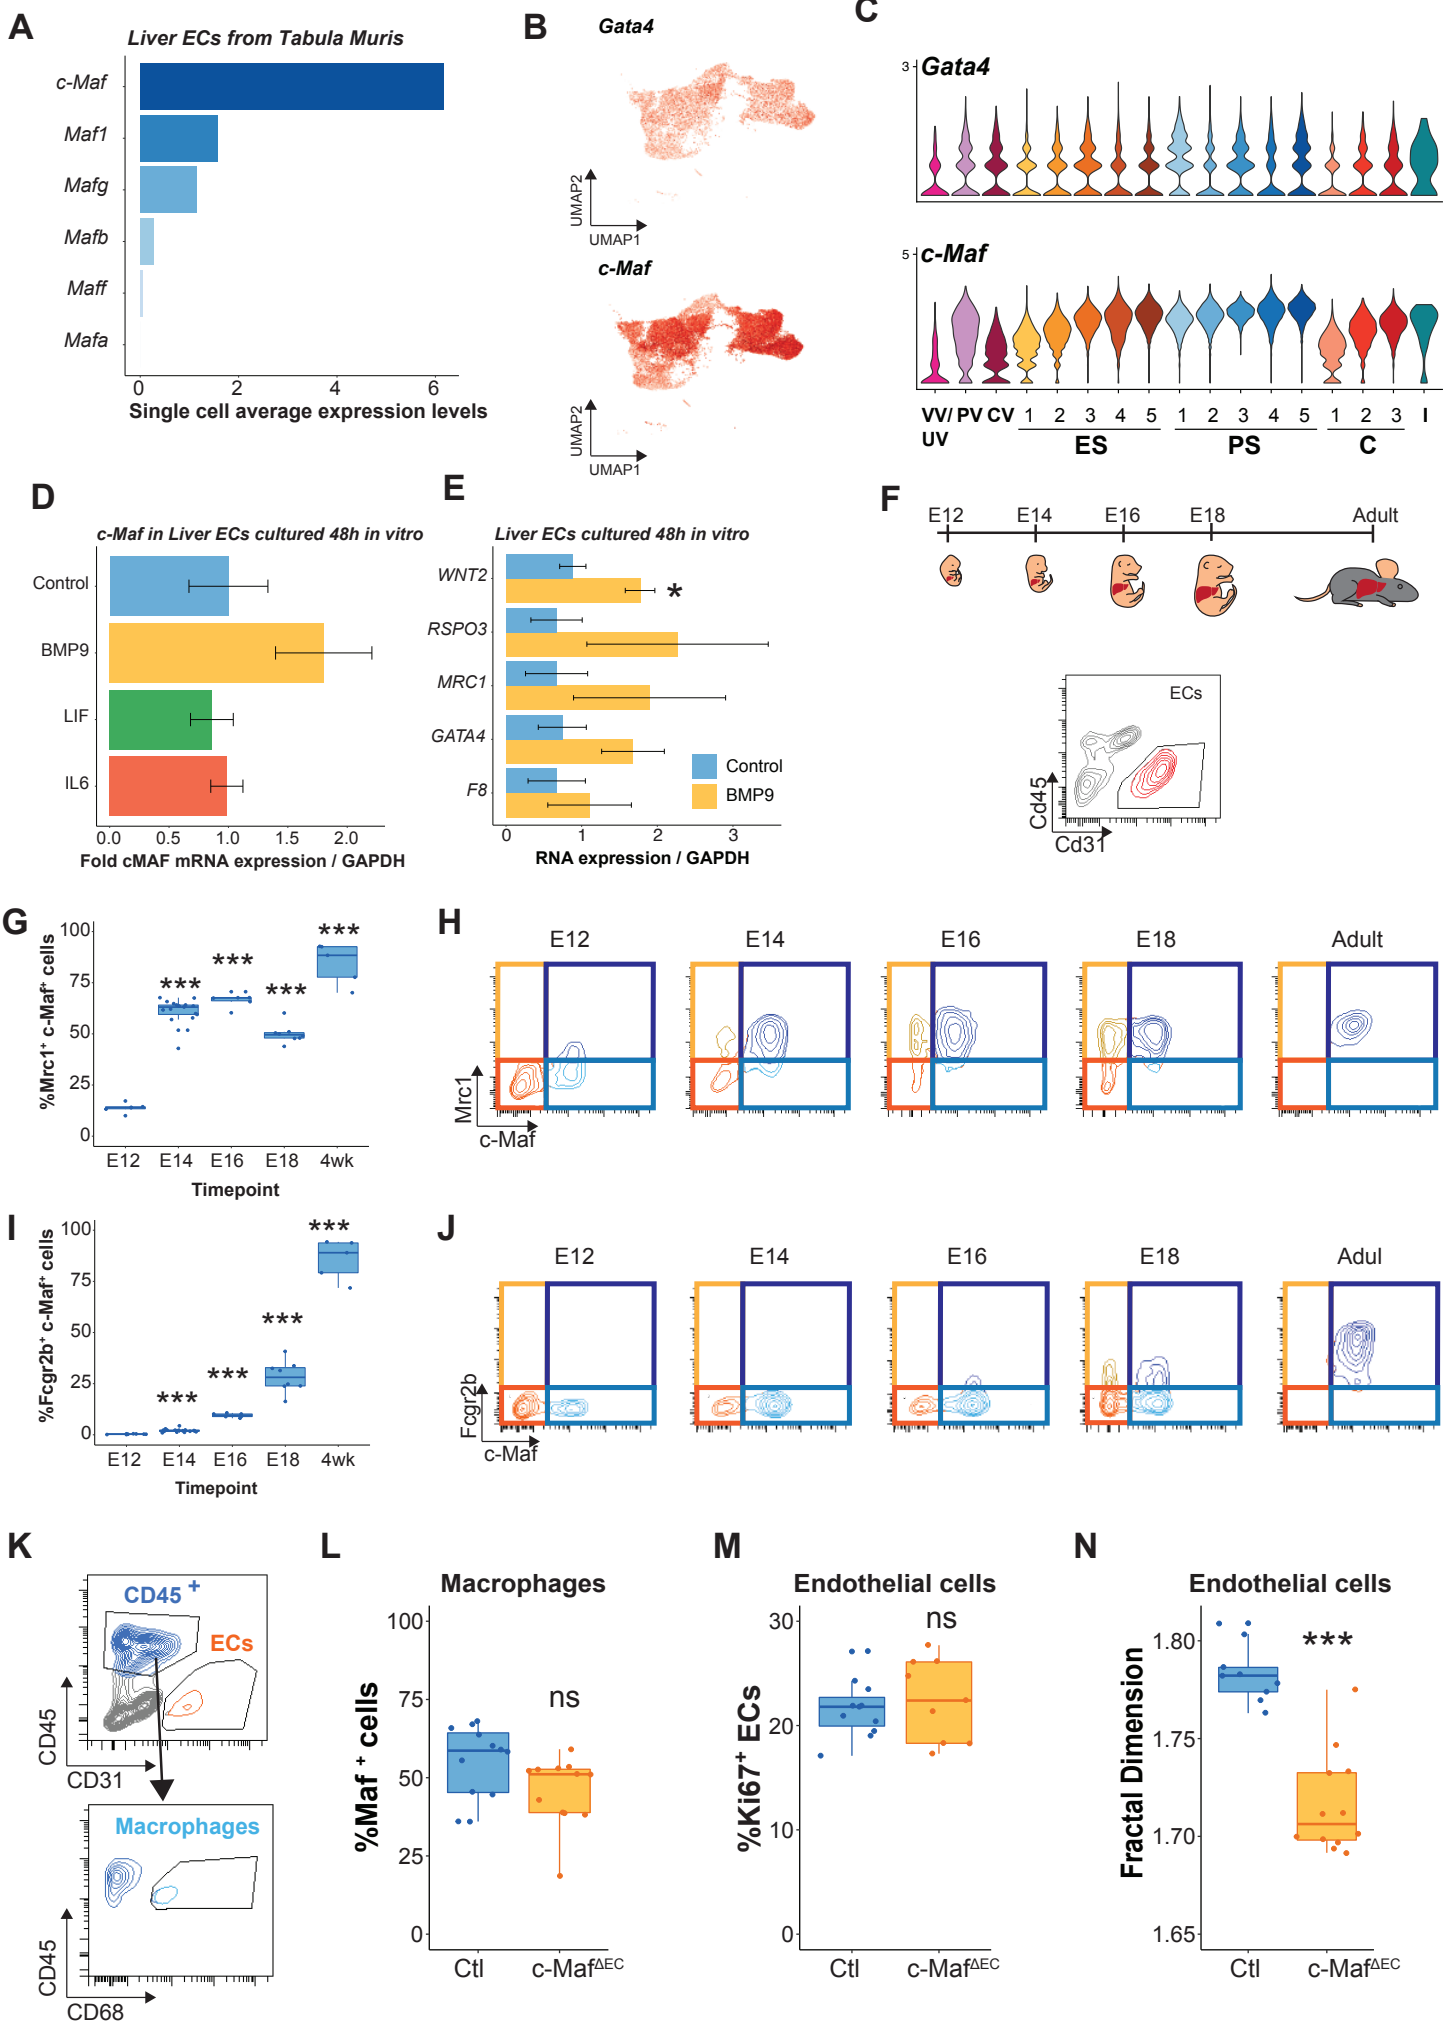



**Figure S4. c-Maf is enriched in the liver sinusoidal cell population and sustained over time. Related to Figure 2 and Figure 3.**

(A) Expression levels of the Maf family members in liver ECs from the Tabula Muris database. (B) UMAP expression of the transcription factors Gata4 and c-Maf within the present study's single cell RNAseq analysis. (C) Expression levels of Gata4 and c-Maf were assessed in all EC populations identified in the single cell RNA-seq analysis. (D) Quantitative-PCR (q-PCR) measure of c-Maf expression levels in mouse liver ECs cultured for 48 hours in the presence of Bmp9, Lif, Il6, or a negative control. (E) Expression of liver-enriched genes measured by q-PCR of liver ECs cultured for 48 hours in the presence of Bmp9. A *t*-test analysis was performed between controls and the other conditions, with \* $p < 0.05$ . (F) Flow cytometry identification of endothelial cells as CD45<sup>neg</sup>CD31<sup>+</sup> across fetal E12, E14, E16, E18 and adult mice. (G-J) Flow cytometry analysis of the expression levels of c-Maf - Mrc1 (G,H), and c-Maf - Fcg2b (I,J) in the liver ECs,  $n \geq 5$ . Colors indicate the quadrant from the flow cytometry gating. Percentage of cells identified by flow cytometry that were double positive for c-Maf and Mrc1 (H) or Fcgr2b (J) from  $n \geq 5$  mice across different developmental timepoints. A *t*-test analysis between E12 and each other timepoint was performed. \*\*\*  $p < 0.001$ . (K) Flow cytometry analysis of the vasculature and myeloid CD45<sup>+</sup>, CD68<sup>+</sup> compartment in mice at E16 from Control and c-Maf<sup>f<sup>Δ</sup>EC</sup> mice. Labels indicate identification of the different populations (L), Expression of c-Maf was not affected in myeloid cells after tamoxifen administration at E16. (M) Percentage of cells positive for Ki67 analyzed by flow cytometry at E16. T-test was not significant,  $n \geq 9$ . (N) Analysis of the change in fractal dimension of the vascular network in control and c-Maf<sup>f<sup>Δ</sup>EC</sup> mice at E16,  $n \geq 9$ . A *t*-test was used for the comparison of control and c-Maf<sup>f<sup>Δ</sup>EC</sup> mice, with \*  $p < 0.05$ , \*\*  $p < 0.01$ , \*\*\*  $p < 0.001$ .

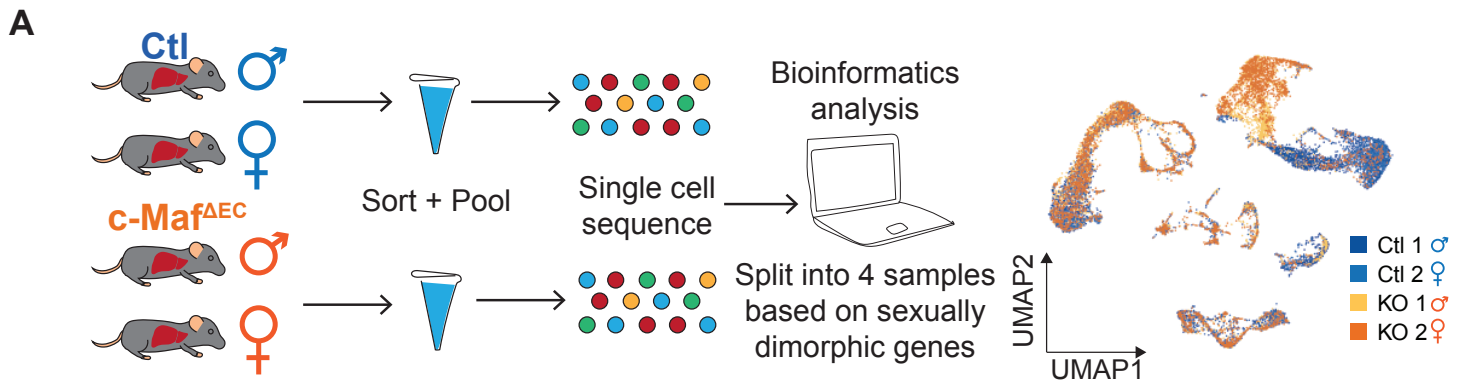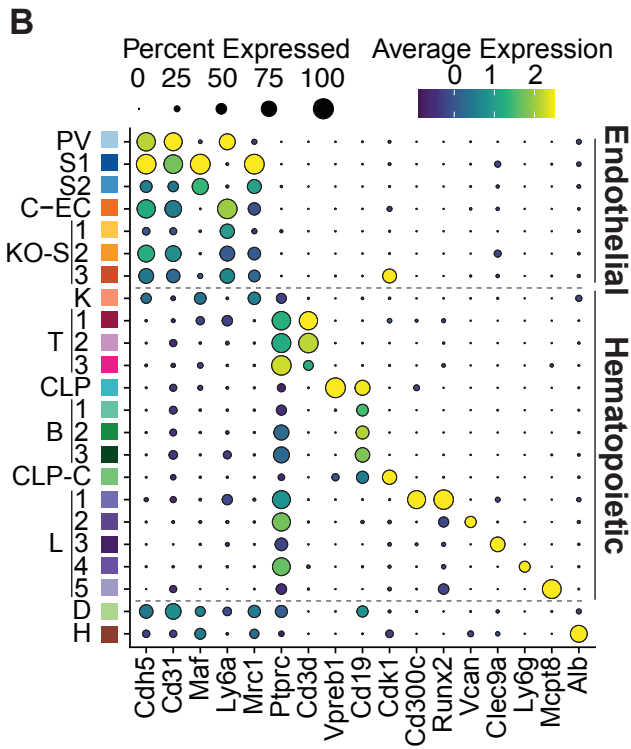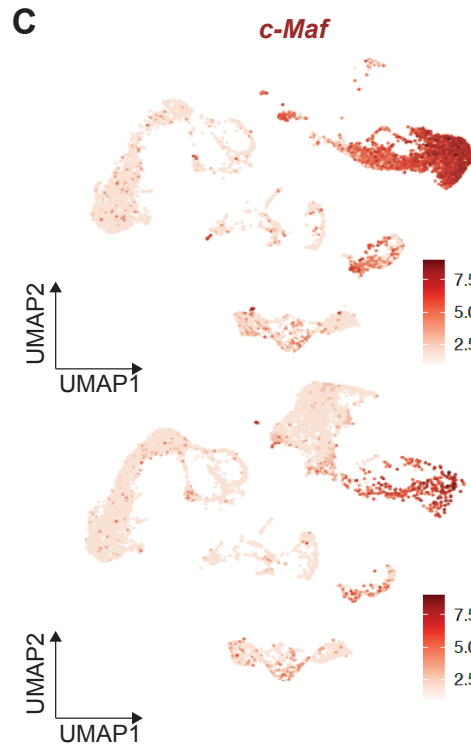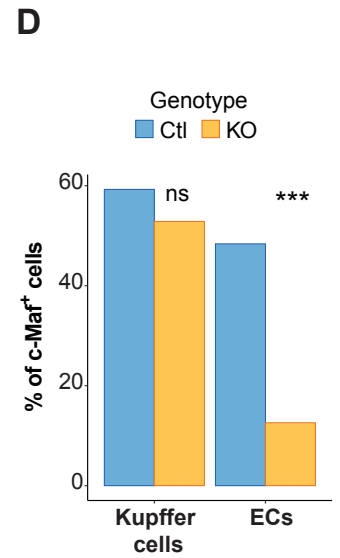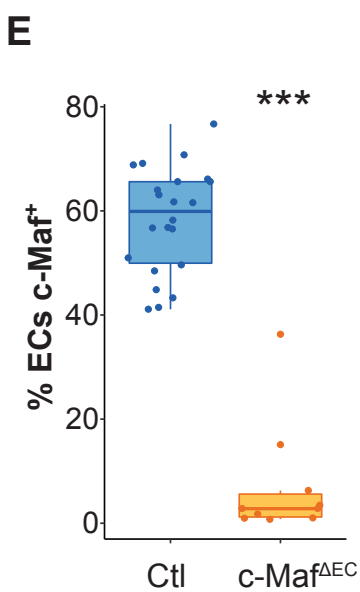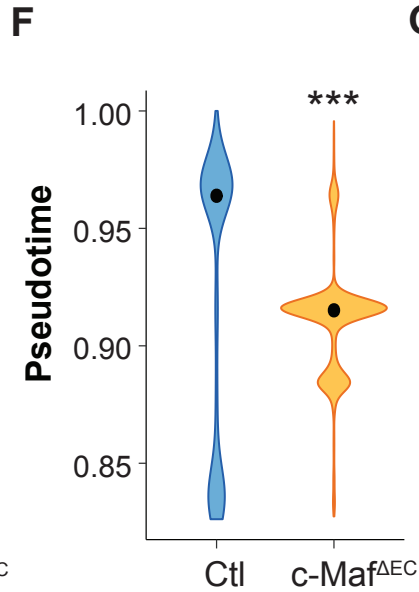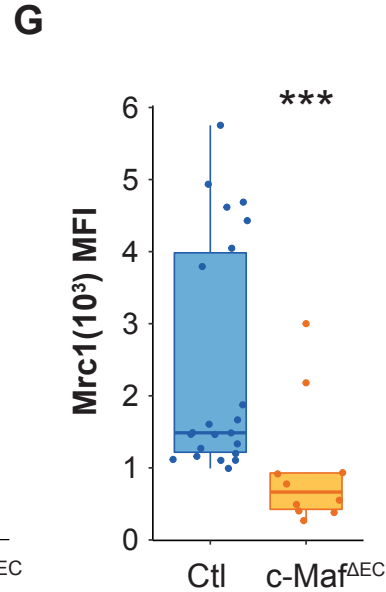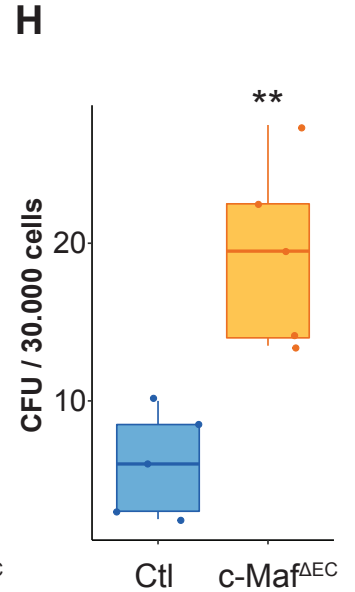

**Figure S5. c-Maf deficient ECs differentially segregate postnatally. Related to Figure 4.**

(A) Single cell RNA-seq was performed at p15 for one male and one female mouse each from the two groups (Control and c-Maf<sup>f<sup>Δ</sup>EC</sup>). Samples from each group were sorted and combined for the single cell analysis. Subsequently the two samples were bioinformatically split into their original four samples based on the expression of sexually dimorphic genes in each cell. All four samples were plotted in a UMAP showing the overlap of all samples. (B) Identification of individual populations from the scRNA-seq analysis based on expression of specific markers. Endothelial populations: Sinusoids (S1, S2), KO-Sinusoids (KO-S 1-3), Cycling (C), Portal Vein (PV); Hematopoietic populations: Common lymphoid progenitors (CLP), Cycling – CLP (C-CLP), B cells (B 1-3), T cells (T 1-3), Leukocytes (L 1-5) and Kupffer cells; Contaminant cells were identified as: Doublets (D) and Hepatocytes (H). (C) UMAP representation of the expression levels of c-Maf in control and c-Maf<sup>f<sup>Δ</sup>EC</sup> mice in all populations. (D) Percentage of cells positive for c-Maf in the ECs and Kupffer cell populations shows no significant changes in the Kupffer cell population but significant decreased in the EC clusters of c-Maf<sup>f<sup>Δ</sup>EC</sup> mice. (E) Flow cytometry quantification of the percentage of ECs expressing c-Maf in control and c-Maf<sup>f<sup>Δ</sup>EC</sup> mice, n ≥ 10. (F) Pseudotime changes in the control and c-Maf<sup>f<sup>Δ</sup>EC</sup> mice identifying a shorter transitional stage for the c-Maf<sup>f<sup>Δ</sup>EC</sup> mice. (G) Flow cytometry quantification of the medium fluorescent intensity of Mrc1 and Fcgr2b expression levels in control and c-Maf<sup>f<sup>Δ</sup>EC</sup> mice, n ≥ 10. Significance was measured using a *t*-test comparing both groups, with \*\*\*p<0.001. (H) CFU analysis of sorted CD45 total cells from control and c-Maf<sup>f<sup>Δ</sup>EC</sup> mice, n = 5. A *t*-test was used for comparisons between control and c-Maf<sup>f<sup>Δ</sup>EC</sup> mice in this figure, with \* p < 0.05, \*\* p < 0.01, \*\*\* p < 0.001.

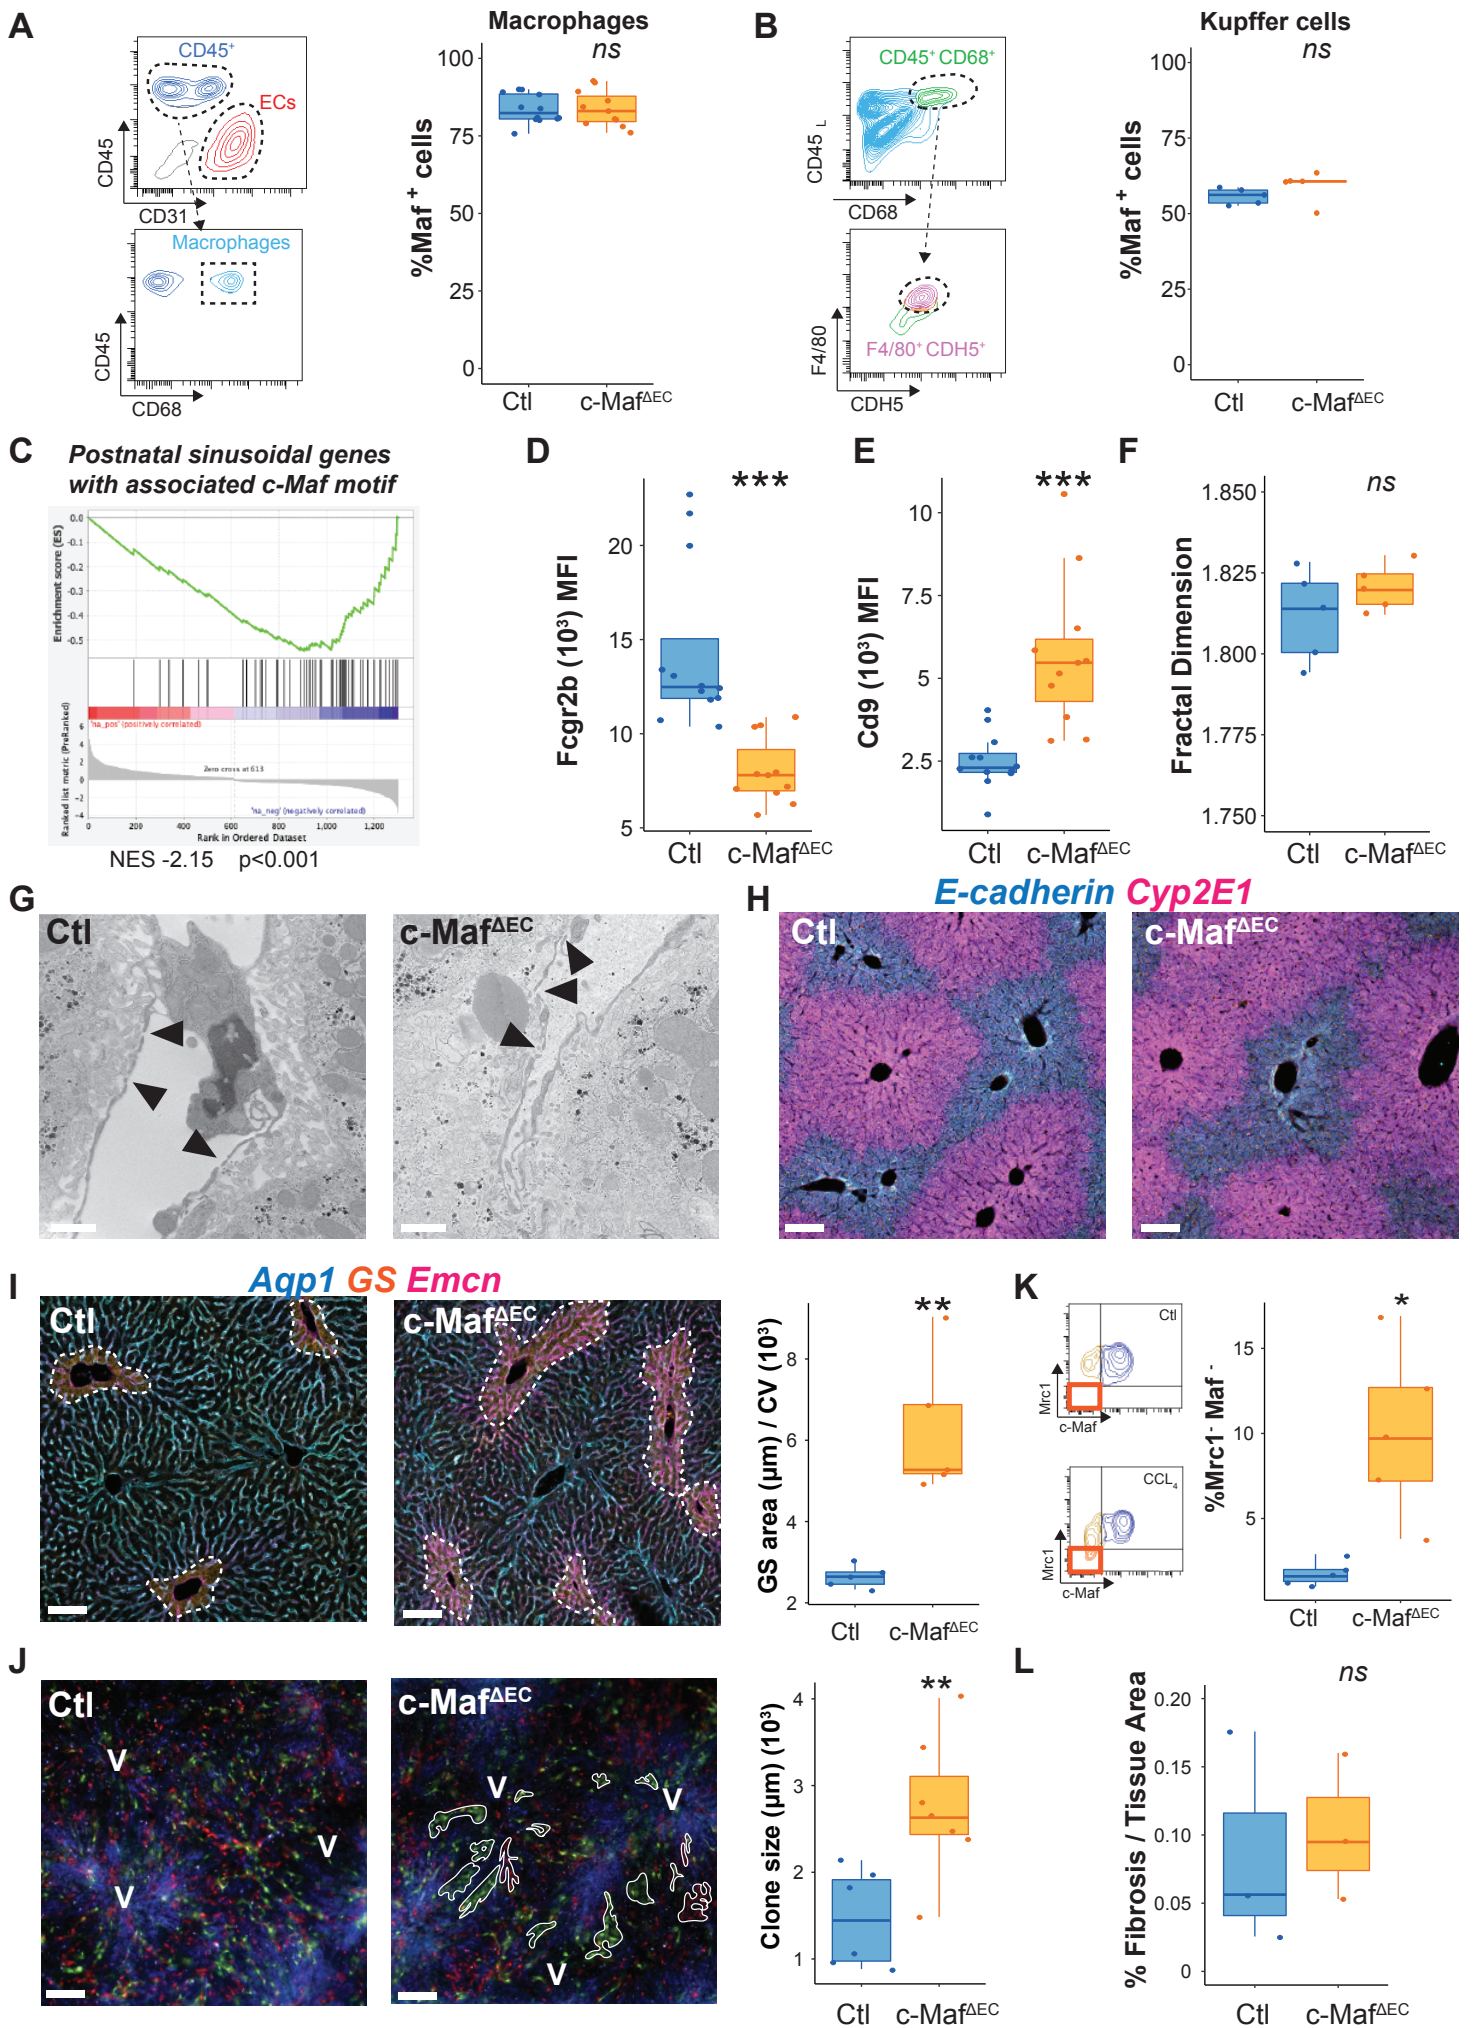

**Figure S6. Adult vascular c-Maf deficiency is associated with a loss of the sinusoidal program. Related to Figure 5.**

(A-B) Analysis of c-Maf expression in macrophages (CD45<sup>+</sup>CD68<sup>+</sup>) (A) and Kupffer cells (CD45<sup>+</sup>CD68<sup>+</sup>F4/80<sup>+</sup>CDH5<sup>+</sup>) shows no significant differences, n ≥ 11 (A), and n = 5 (B). (C) GSEA analysis of the expression levels of postnatal sinusoidal genes with an associated c-Maf motif. (D-E) Flow cytometry quantification of the medium fluorescent intensity in the endothelial cell population of the sinusoidal marker Fcgr2b (D) and the arterial marker Cd9 (E). (F) Quantification of the vascular network interactome assay as the fractal dimension of the vasculature in control and c-Maf<sup>f<sup>Δ</sup>EC</sup> mice from n = 5 with t-test analysis between the groups showing no significant difference. (G) Electron microscopy of livers from Control and c-Maf<sup>f<sup>Δ</sup>EC</sup> mice from n = 3 showing presence of fenestration in c-Maf<sup>f<sup>Δ</sup>EC</sup> mice. Arrows indicate fenestrations. (H) Immunofluorescence analysis of the portal to centrilobular makers E-cadherin and Cyp2E1 respectively shows no changes in the overall zonation between control and c-Maf<sup>f<sup>Δ</sup>EC</sup> mice from n = 5. (I) Immunofluorescence quantification analysis of the area positive for GS staining in Control and c-Maf<sup>f<sup>Δ</sup>EC</sup> mice from n = 5 mice with t-test \*\*p,0.01. (J) Immunofluorescence quantification analysis of clonal vascular size of Confetti mice crossed with c-Maf<sup>f<sup>Δ</sup>EC</sup> mice, compared to control adult mice, n ≥ 6 with t-test \*\*p,0.01. (K) Flow cytometry analysis of the expression levels of c-Maf and Mrc1 in mice treated biweekly with oil and 25% CCl<sub>4</sub> diluted in oil from n = 5. Data represents the percentage of cells that were double negative for Mrc1 and c-Maf in both groups with t-test \*p<0.05. (L) Quantification of the percentage of fibrosis over the total tissue area from n =3 of control and c-Maf<sup>f<sup>Δ</sup>EC</sup> mice, t-test analysis between the groups showing no significant difference.

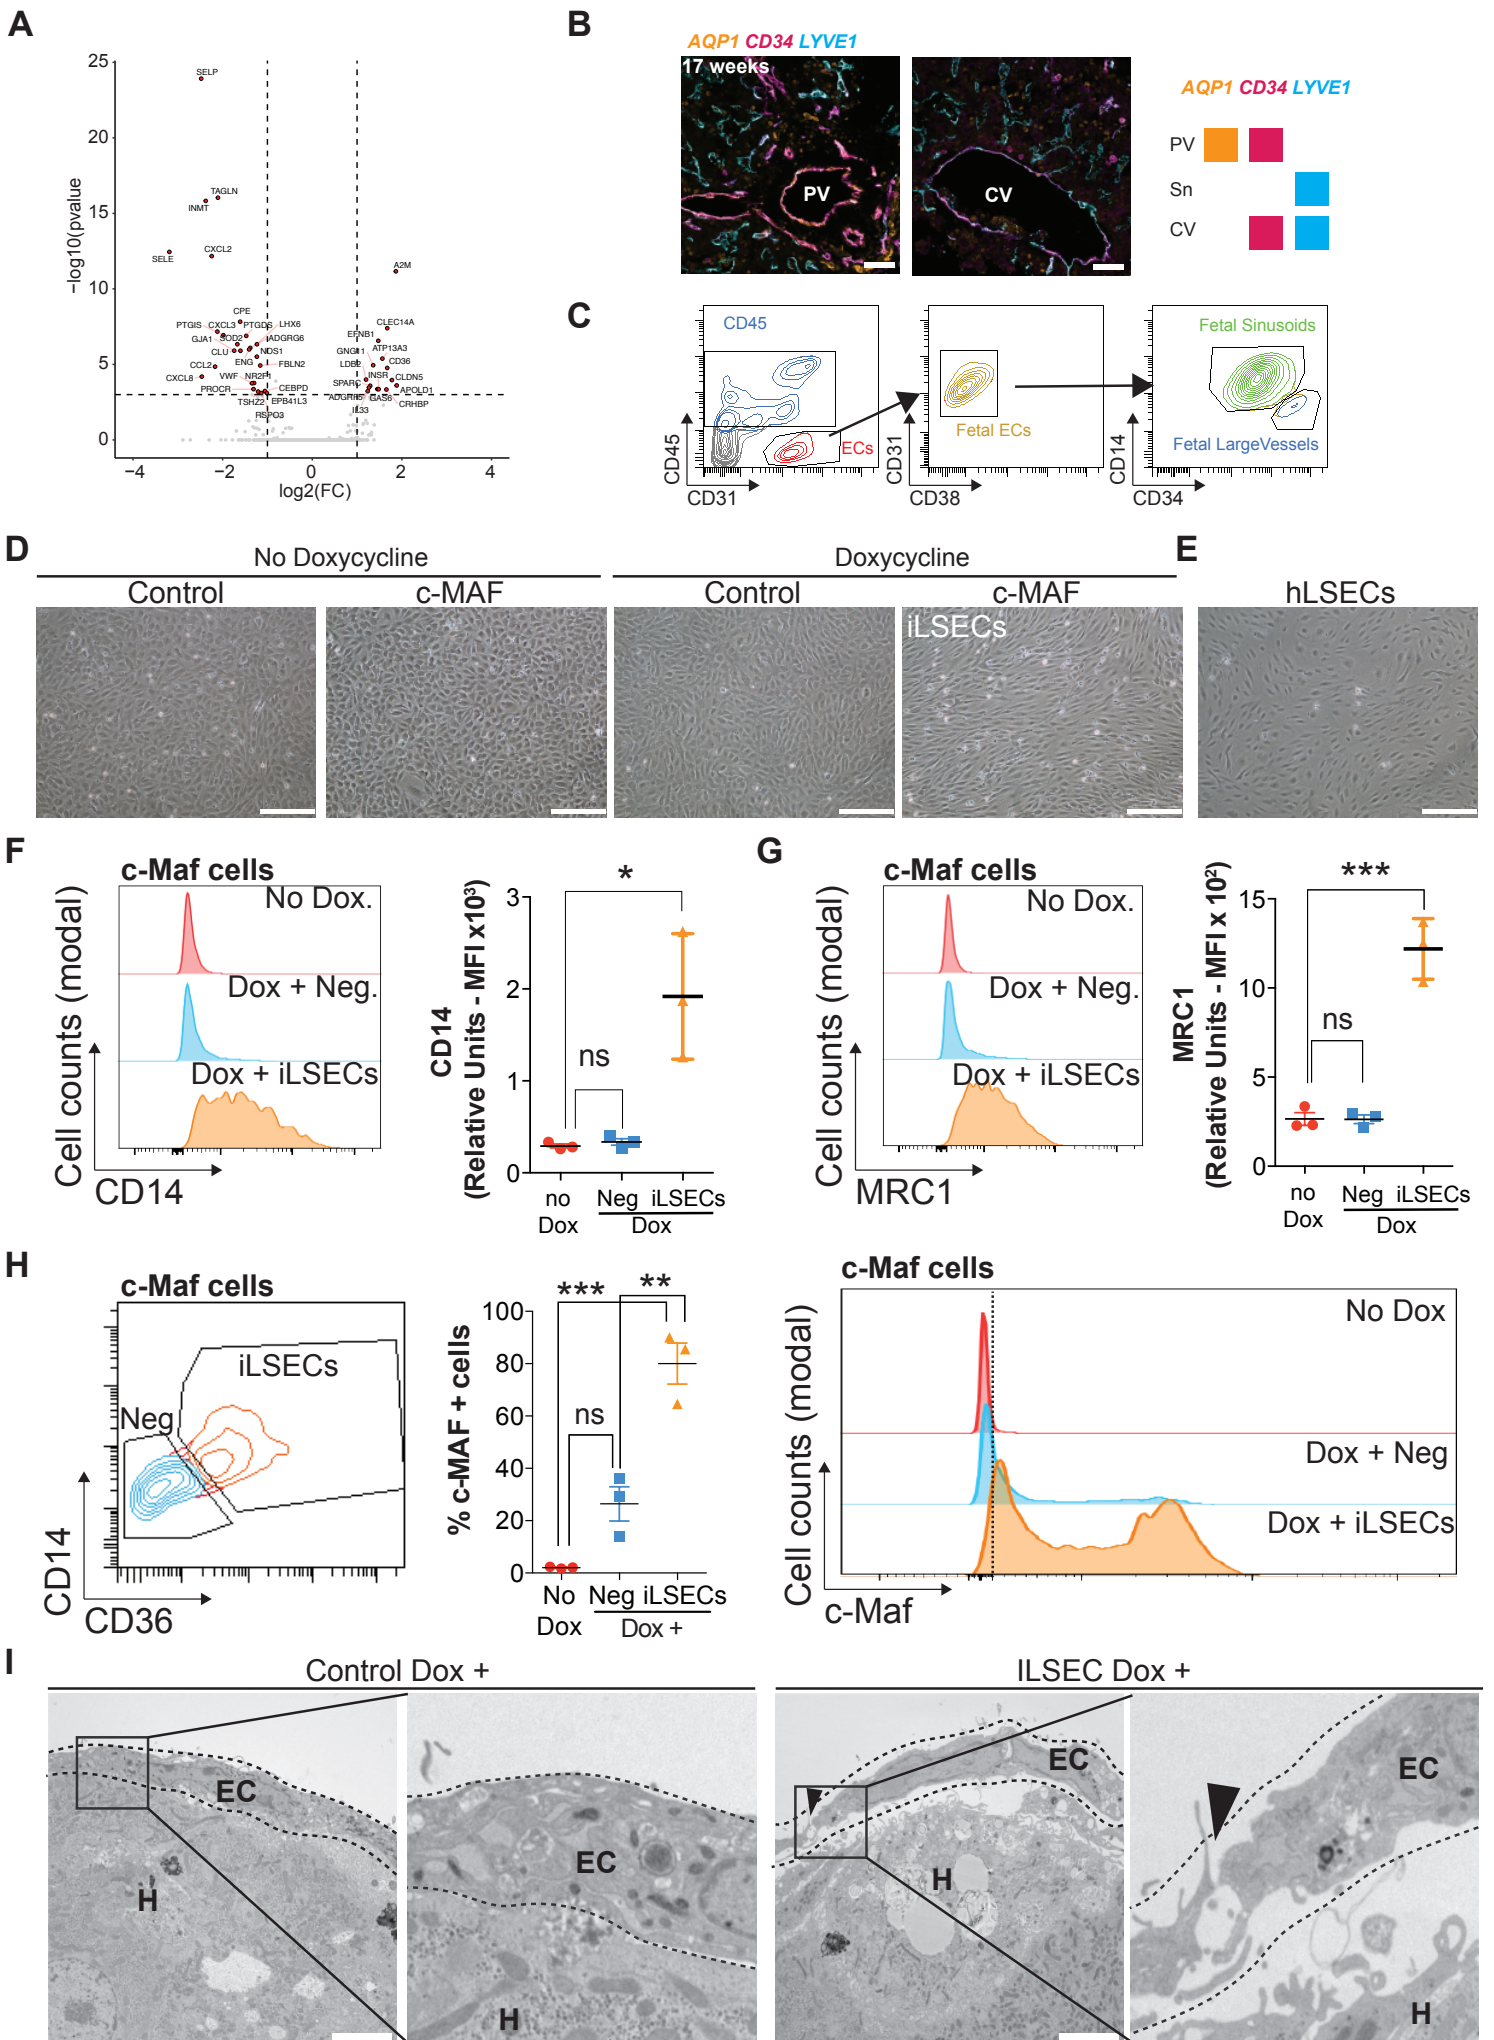

**Figure S7. Overexpression of c-Maf in endothelial cells (iLSECs) induces the expression of surface markers associated to human liver sinusoidal cells. Related to Figure 6 and Figure 7.**

**(A)** Volcano plot comparing the Portal Vein and Central Vein gene signatures. **(B)** Immunofluorescent analysis of a 17-week human liver sample labeled with Aqp1, Cd34, and Lyve1 allows the identification of the Portal Vein, sinusoids, and Central Vein. Boxes represent the labeling of the gene at a particular population. Bar size = 50  $\mu\text{m}$ . **(C)** Flow cytometry expression analysis of vascular markers in a 17-week human liver sample shows the expression of CD14 and CD34 by liver ECs at this fetal developmental stage. At 17 weeks of human fetal development, we could not observe the population of plasma cells  $\text{CD45}^{\text{neg}}\text{CD31}^+\text{CD38}^+$ . **(D)** ECs transduced with a lentiviral control vector or c-Maf inducible vector co-cultured with or without doxycycline for seven days. Representative image of  $n=3$ . Bar size = 250  $\mu\text{m}$ . **(E)** Representative image of human liver EC culture *in vitro* after isolation with CD144 (VE-Cadherin – CDH5) beads,  $n=1$ . Bar size = 250  $\mu\text{m}$ . **(F-G)** Quantification of CD14 (F) and MRC1 (G) expression levels by flow cytometry of iLSECs compared to negative (non-reprogrammed) cells.  $n=3$  (different donors). *t*-test analysis,  $*p<0.05$ ,  $***p<0.001$ . **(H)** Identification of iLSECs as  $\text{CD36}^+\text{CD14}^+$  by flow cytometry. Expression of c-Maf in iLSECs compared to negative ( $\text{CD36}^-\text{CD14}^-$ ) cells or cells cultured without doxycycline. Representative image of  $n=3$ . **(I)** Electron microscopy analysis of the co-culture of hepatocytes with control ECs or iLSECs. Arrows indicate the existence of empty cavities in the iLSECs, but not the controls, that emulate fenestrations. White bar represents 1  $\mu\text{m}$ .
